# Supplementary material for: A three-dimensional porous MoS2–PVP aerogel as a highly efficient and recyclable sorbent for oils and organic solvents
Source: Royal Society of Chemistry journal article supplement (doi:10.1039/d0ma00219d), 2020-01-01
Supplement: d0ma00219d2.pdf [file d0ma00219d2.pdf]

**A three-dimensional porous MoS<sub>2</sub>-PVP aerogel as a highly efficient and recyclable sorbent for oils and organic solvents**

Pin Song<sup>a,\*</sup>, Jun Di<sup>a</sup>, Haiping Chen<sup>b</sup>, Sirui Zhao<sup>c</sup>, Cao Wu<sup>d</sup>, Xun Cao<sup>a</sup>, Meiling Wang<sup>e</sup>, Jun Xiong<sup>f,\*</sup>, Xinli Ye<sup>d</sup>

## Supporting figures

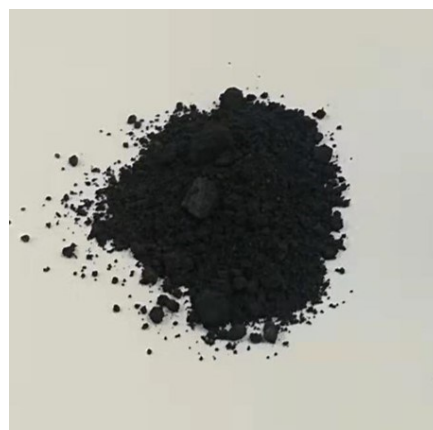

MoS<sub>2</sub>

Freezing drying

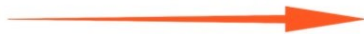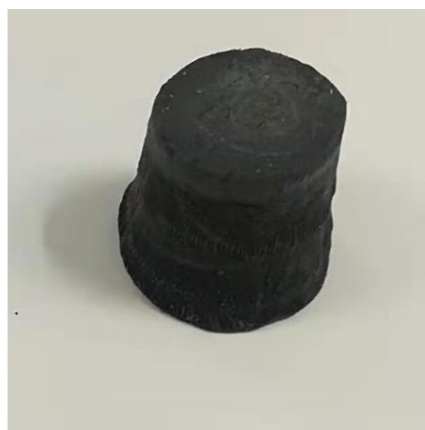

3D MoS<sub>2</sub>-PVP aerogel

**Fig S1.** Optical photograph of MoS<sub>2</sub> powder to 3D MoS<sub>2</sub>-PVP aerogel.

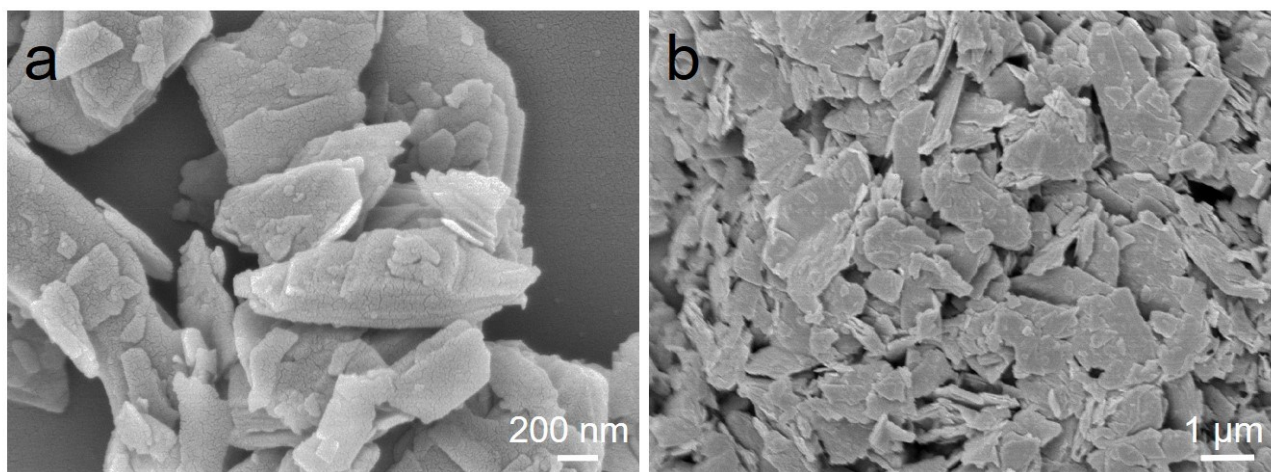

**Fig S2.** SEM images of (a) MoS<sub>2</sub>, (b) MoS<sub>2</sub>-PVP.

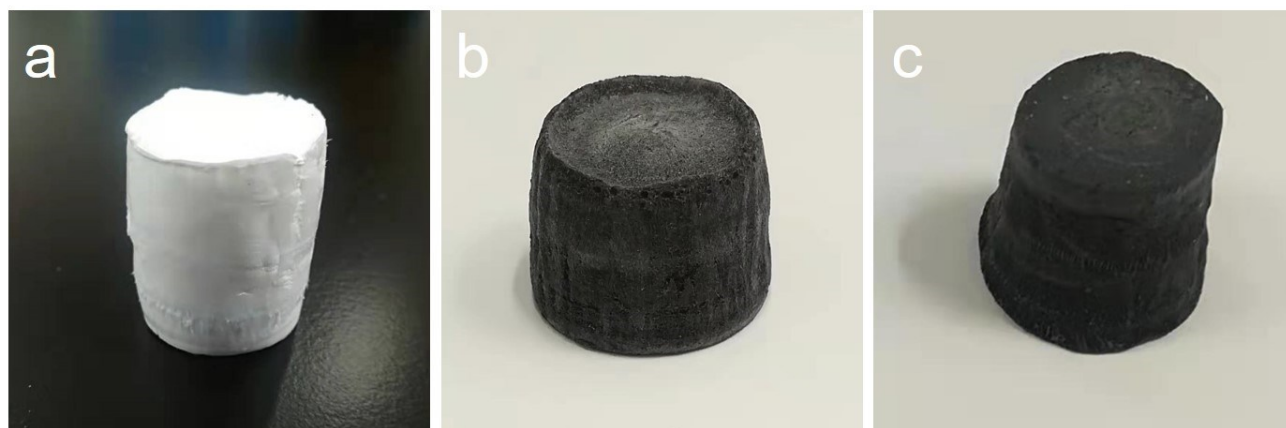

**Fig S3.** Photographs of 3D MoS<sub>2</sub>-PVP aerogels with different concentrations of MoS<sub>2</sub>. (a) 0, (b) 10, (c) 20 mg cm<sup>-3</sup>.

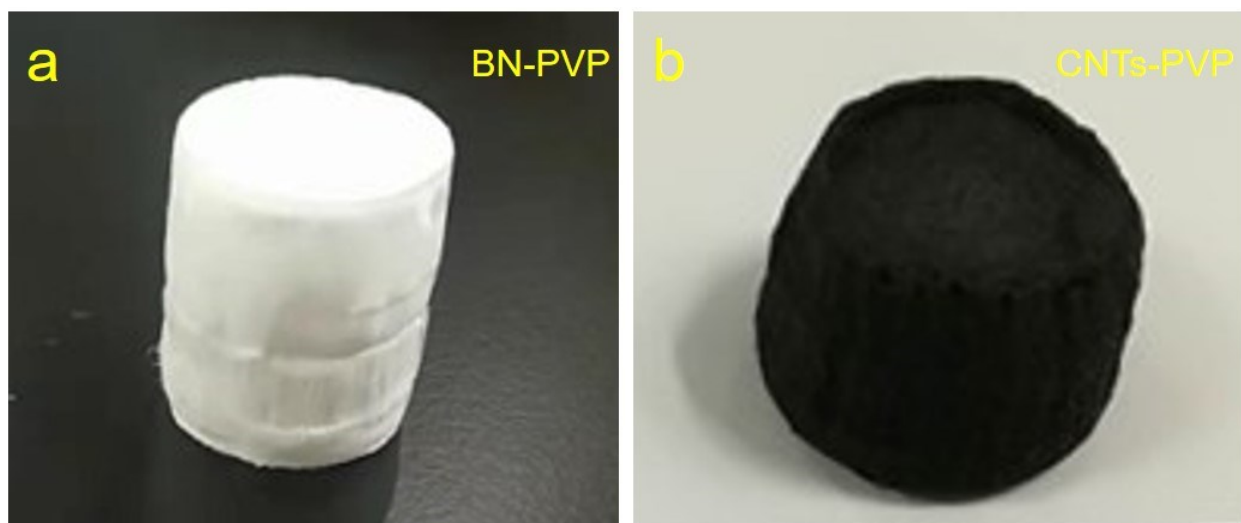

**Fig S4.** (a-b) Photographs of BN-PVP aerogels and CNTs-PVP aerogels.

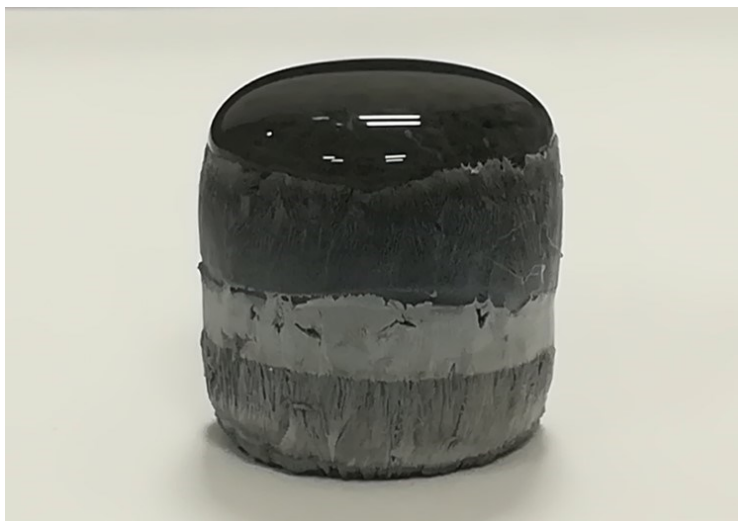

**Fig S5.** Optical photograph of a water droplet on the 3D MoS<sub>2</sub>-PVP aerogel surface.

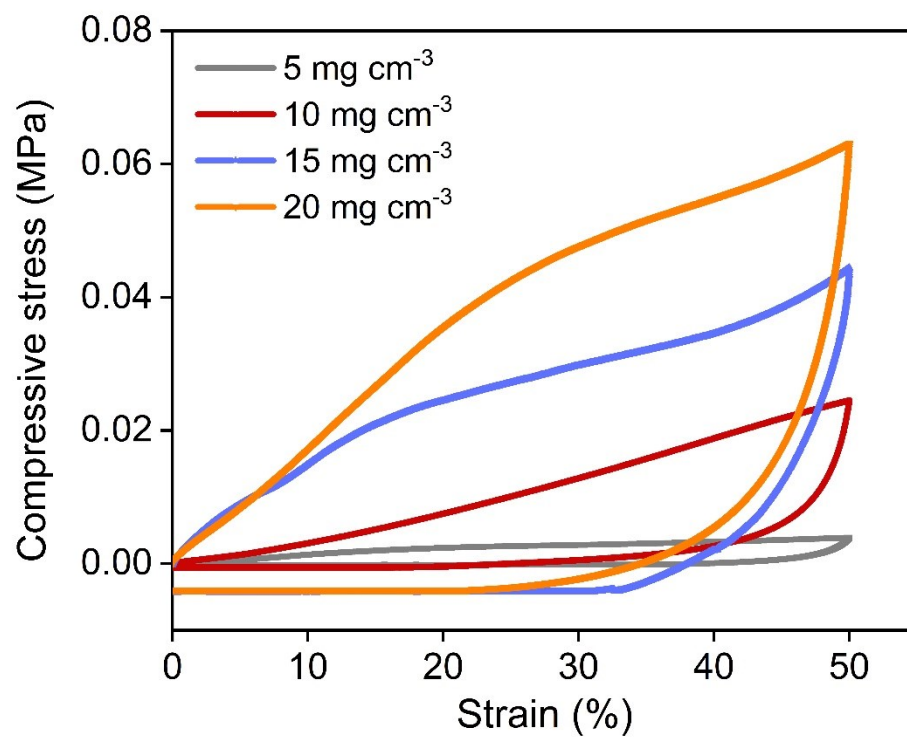

**Fig S6.** Compressive curves of 3D MoS<sub>2</sub>-PVP aerogel with different concentrations of MoS<sub>2</sub>. (a) 5, (b) 10, (c) 15, (d) 20 mg cm<sup>-3</sup>.

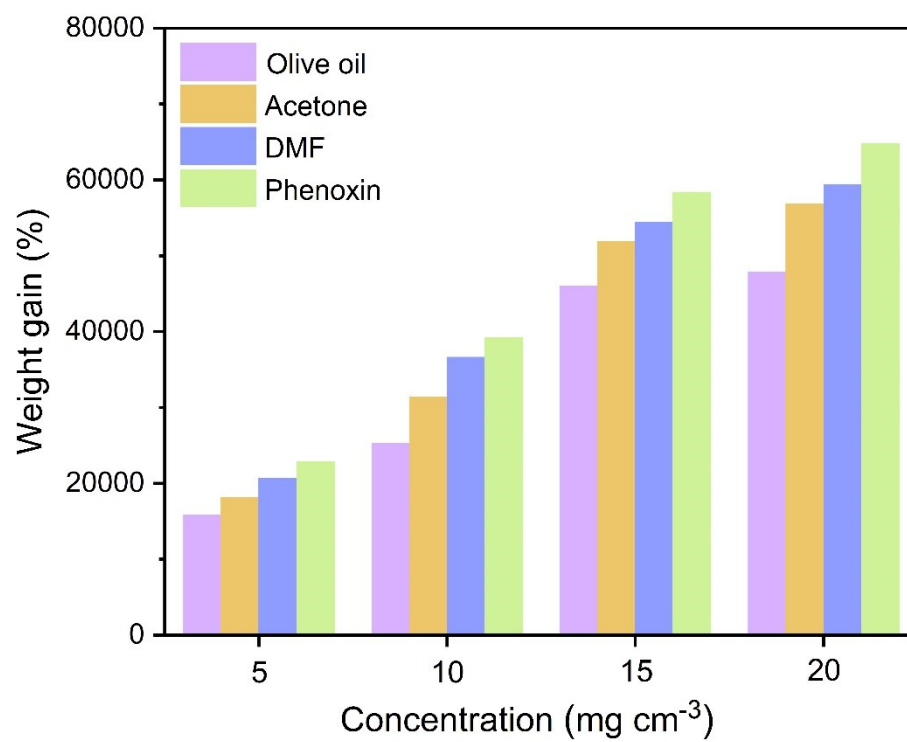

**Fig S7.** The Adsorption capacity of 3D MoS<sub>2</sub>-PVP aerogels with different concentrations of MoS<sub>2</sub>.



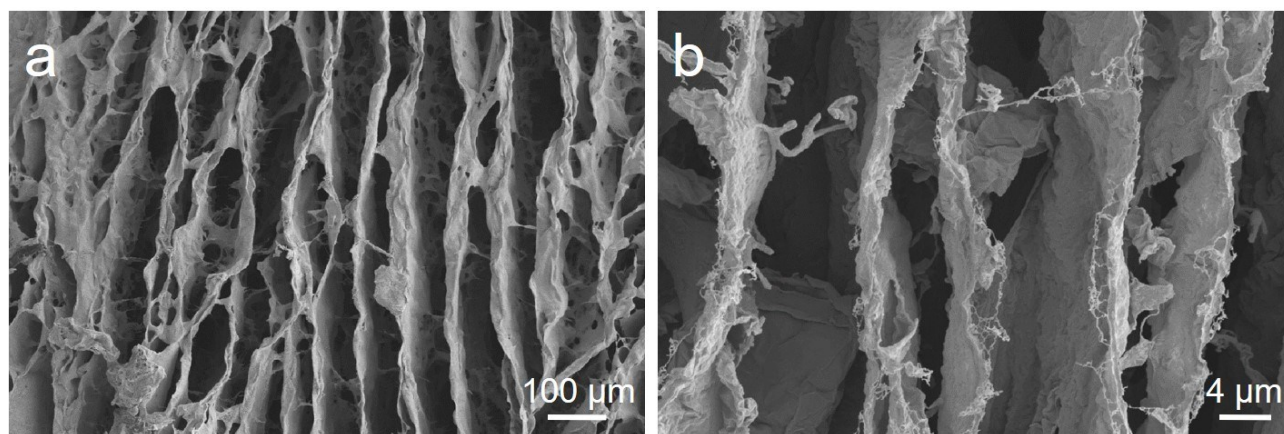

**Fig S8.** Photographs of the squeezing process of 3D MoS<sub>2</sub>-PVP aerogel.

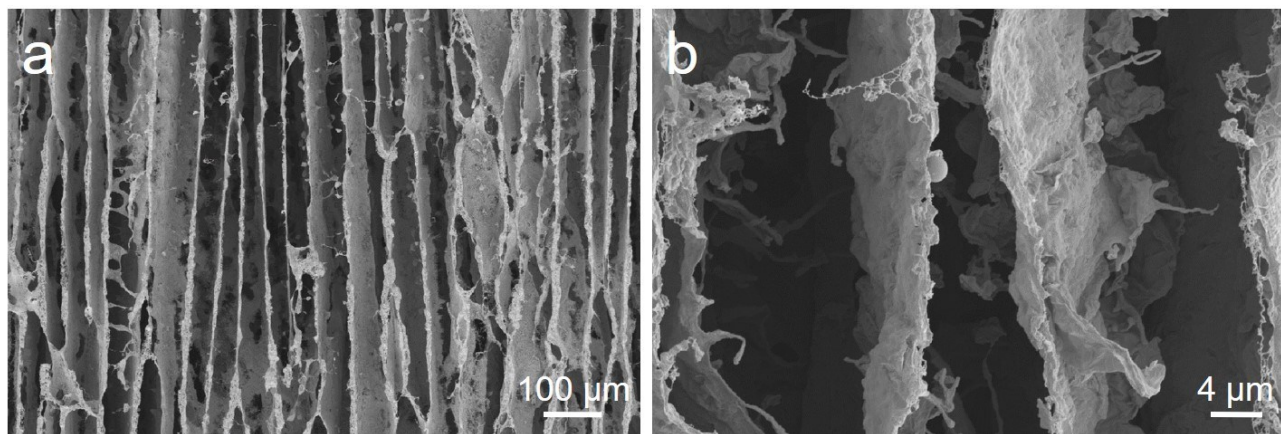

**Fig S9.** Photographs of the distillation process of 3D MoS<sub>2</sub>-PVP aerogel.

## Supporting table

Table S1. The specific surface area of 3D MoS<sub>2</sub>-PVP aerogels with different concentrations of MoS<sub>2</sub>.

| Concentration (mg cm <sup>-3</sup> )                    | 0    | 5    | 10   | 15   | 20   |
|---------------------------------------------------------|------|------|------|------|------|
| Specific surface area (m <sup>2</sup> g <sup>-1</sup> ) | 44.5 | 75.2 | 79.6 | 83.5 | 90.4 |

## Supporting Movie

Movie S1
